# Supplementary material
Source: publisher figshare collection journal article supplement (https://wiley.figshare.com/articles/dataset/_/3547422)
Supplement: Supplementary file 1 [file 1 › appendix-A.htm]

Ecological Archives E091-146-A1


### *Ecological Archives* E091-146-A1

### **Jose Raventós, Thorsten Wiegand, and Martín de Luis. 2010. Evidence for the spatial segregation hypothesis: a test with nine-year survivorship data in a Mediterranean fire-prone shrubland. *Ecology* 91:2110–2120.**

Appendix A. Details on methods of spatial pattern analysis.

> View / download PDF.

---


[Back to E091-146]
